# Supplementary material
Source: PubMed Central journal article supplement (PMC10814333)
Supplement: Supplementary_Figure_1.pdf [file Supplementary_Figure_1.pdf]

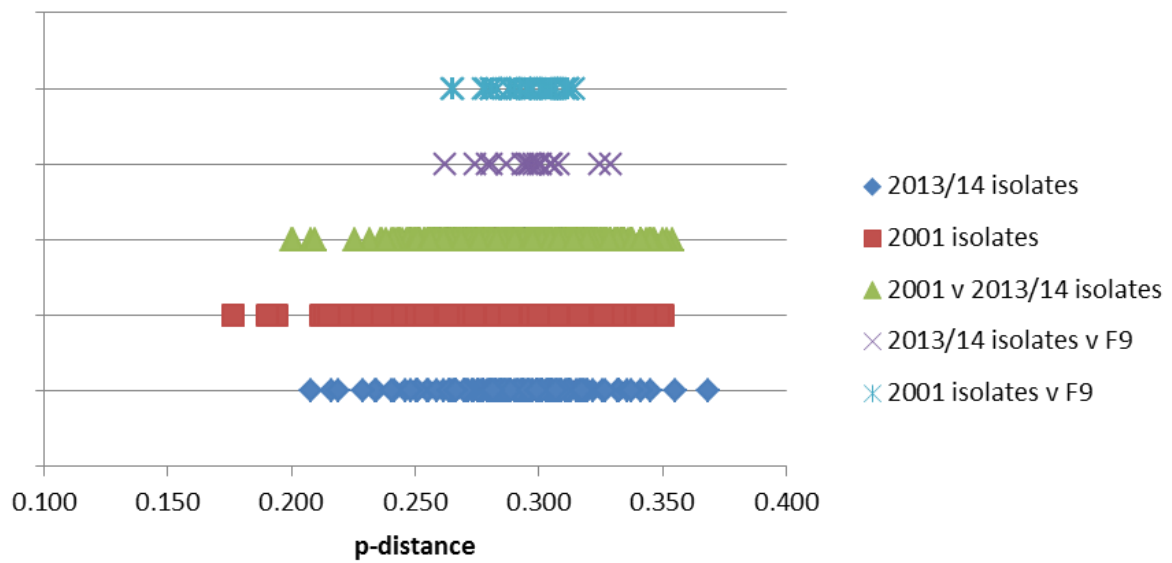

**Supplementary Figure 1: Evolutionary divergence between sequences.** Pairwise nucleotide distances between sequences were calculated using the Maximum Composite Likelihood model in MEGA6<sup>21</sup>. The analysis involved 56 nucleotide sequences (including FCV-F9), each with 432 nucleotides in the final data set. Distances are shown between isolates within each time period (intra-group distances), between isolates in each group (inter-group distances) and between isolates in each group and F9.
