# Supplementary material
Source: PubMed Central journal article supplement (PMC10814333)
Supplement: Supplementary_Table_1.pdf [file Supplementary_Table_1.pdf]

| Isolate name | RCVS Region 2001 | Mouth Ulcers | URTD | Acute disease | Virus titre (TCID <sub>50</sub> ) | Neutralising titre | Plotted titre |
|--------------|------------------|--------------|------|---------------|-----------------------------------|--------------------|---------------|
| Bi_16_01     | Birmingham       | N            | N    | N             | 100                               | 22.6               | 22.6          |
| Be_07_01     | Berkshire        | N            | N    | N             | 100                               | 362.0              | 362.0         |
| Cu_01_01     | Cumbria          | N            | n/a  | n/a           | 32                                | 362.0              | 362.0         |
| Ca_11_01     | Cambridgeshire   | N            | N    | N             | 32                                | 11.3               | 11.3          |
| Do_07_01     | Dorset           | N            | N    | N             | 215                               | 16.0               | 16.0          |
| De_19_01     | Derbyshire       | N            | N    | N             | 215                               | 128.0              | 128.0         |
| Cle_05_01    | Cleveland        | N            | N    | N             | 46                                | 608.9**            | 512.0         |
| Es_03_01     | Essex            | n            | n    | N             | 170                               | 11.3               | 11.3          |
| Le_13_01     | Leicestershire   | n/a          | n/a  | n/a           | 32                                | 45.3               | 45.3          |
| L_02_01      | Lancashire       | N            | N    | N             | 316                               | 362.0              | 362.0         |
| Li_13_01*    | Lincolnshire     | Y            | N    | Y             | 100                               | 16.0               | 16.0          |
| No_08_01     | Nottinghamshire  | N            | N    | N             | 316                               | 128.0              | 128.0         |
| Ox_02_01*    | Oxfordshire      | Y            | N    | Y             | 147                               | 45.3               | 45.3          |
| Ke_04_01*    | Kent             | N            | Y    | Y             | 170                               | 181.0              | 181.0         |
| Wo_09_01     | Worcestershire   | N            | N    | N             | 100                               | 45.3               | 45.3          |
| Wa_12_01     | Warwickshire     | N            | N    | N             | 32                                | 724.1              | 724.1         |
| Nor_17_01    | Northumberland   | N            | N    | N             | 170                               | 152.2**            | 128.0         |
| Wi_11_01     | Wiltshire        | N            | N    | N             | 100                               | 256.0              | 256.0         |
| Su_09_01*    | Suffolk          | Y            | N    | Y             | 316                               | 64.0               | 64.0          |
| Ch_09_01     | Channel Islands  | N            | N    | N             | 32                                | 32.0               | 32.0          |
| Sa_05_01     | Salop            | N            | N    | N             | 32                                | 45.3               | 45.3          |
| Ha_20_01     | Hampshire        | N            | N    | N             | 215                               | 362.0              | 362.0         |
| Mi_19_01*    | Middlesex        | N            | Y    | Y             | 46                                | 181.0              | 181.0         |
| Du_04_01     | Dumfries         | N            | N    | N             | 316                               | 22.6               | 22.6          |
| Ed_20_01     | Edinburgh        | N            | N    | N             | 215                               | 181.0              | 181.0         |
| Or_04_01     | Orkney           | N            | N    | N             | 59                                | 512.0              | 512.0         |
| Gl_03_01*    | Glamorgan        | N            | Y    | Y             | 32                                | 256.0              | 256.0         |
| Dy_18_01     | Dyfed            | N            | N    | N             | 316                               | 45.3               | 45.3          |
| St_14_01     | Strathclyde      | N            | N    | N             | 215                               | 724.1              | 724.1         |
| Sh_01_01     | Shetland         | N            | N    | N             | 146                               | 11.3               | 11.3          |
| Po_15_01     | Powys            | N            | N    | N             | 215                               | 362.0              | 362.0         |
| CR_01_01     | Co Armagh        | N            | N    | N             | 316                               | 181.0              | 181.0         |
| CD_03_01     | Co Down          | N            | N    | N             | fail                              | fail               | fail          |
| Gy_21_01     | Gwynedd          | n/a          | n/a  | n/a           | 46                                | 181.0              | 181.0         |
| IM_10_01     | Isle of Man      | N            | N    | N             | 46                                | 5.7                | 5.7           |
| Cl_09_01*    | Clwyd            | N            | Y    | Y             | 32                                | 11.3               | 11.3          |
| Gw_07_01     | Gwent            | N            | N    | N             | 46                                | 53.8**             | 45.3          |
| CA_06_01     | Co Antrim        | N            | N    | N             | 100                               | 2048.0             | 2048.0        |
| CT_02_01     | Co Tyrone        | N            | N    | N             | 316                               | 107.6**            | 90.5          |
| CF_13_01     | Co Fermanagh     | N            | N    | N             | 316                               | 861**              | 724.1         |
| Or_11_13     | Orkney           | N            | N    | N             | 46                                | 128.0              | 128.0         |
| Gl_03_13     | Glamorgan        | N            | N    | N             | 46                                | 724.1              | 724.1         |
| Bi_28_13*    | Birmingham       | Y            | N    | Y             | 316                               | 181.0              | 181.0         |
| La_21_13     | Lanarkshire      | N            | N    | N             | 215                               | 11.3               | 11.3          |
| Yo_18_13     | Yorkshire        | N            | N    | N             | 316                               | 64.0               | 64.0          |
| Yo_23_13     | Yorkshire        | N            | N    | N             | 316                               | 22.6               | 22.6          |
| Yo_25_14     | Yorkshire        | N            | N    | N             | 316                               | 11.3               | 11.3          |
| An_07_14     | Anglesey         | N            | N    | N             | 316                               | 256.0              | 256.0         |
| An_10_14     | Anglesey         | N            | N    | N             | 215                               | 128.0              | 128.0         |
| Ss_03_13     | Sussex           | N            | N    | N             | 316                               | 1024.0             | 1024.0        |
| Gy_07_14     | Gwynedd          | N            | N    | N             | 46                                | 1024.0             | 1024.0        |
| Gy_26_14     | Gwynedd          | N            | N    | N             | 100                               | 724.1              | 724.1         |
| Gy_27_14     | Gwynedd          | N            | N    | N             | 100                               | 11.3               | 11.3          |
| Ty_20_14     | Tyneside         | N            | N    | N             | 316                               | 32.0               | 32.0          |
| No_30_13     | Nottinghamshire  | N            | N    | N             | 32                                | 22.6               | 22.6          |
| Ox_07_14*    | Oxfordshire      | Y            | N    | Y             | 215                               | 90.5               | 90.5          |
| Ss_25_13     | Sussex           | N            | N    | N             | 215                               | 181.0              | 181.0         |
| No_15_13*    | Nottinghamshire  | Y            | N    | Y             | 316                               | 45.3               | 45.3          |
| Ox_04_14     | Oxfordshire      | N            | N    | N             | 316                               | 8.0                | 8.0           |
| Ox_12_14*    | Oxfordshire      | N            | Y    | Y             | 100                               | 11.3               | 11.3          |

Supplementary Table 1: Isolate details and results of virus neutralisation using FCV-F9 anti-sera. The isolate name includes a two letter code for the geographical area (also shown in column two), two digits for isolate number and two digits for the year of collection. Virus neutralisation is expressed as the 50% end-point as calculated using the Reed-Muench equation<sup>21</sup>. Clinical isolates are indicated by \* and also highlighted in lilac. The results of neutralisation for 5 isolates\*\* fell outside either a 2-fold dilution or the mid-point between two dilutions. Where this occurred, the result was rounded down to the nearest real value as calculated by the Reed-Muench equation (plotted titres) and this was plotted in Figure 2. One virus repeatedly failed the VN assay (marked as 'fail'). The titre of the virus in the neutralisation test is also shown (the allowable range being 32-320 TCID<sub>50</sub>). n/a indicates this data was not collected.
