# Supplementary material
Source: PubMed Central journal article supplement (PMC10814333)
Supplement: Supplementary_Table_2.pdf [file Supplementary_Table_2.pdf]

| Isolate   | Code in Previous Paper | Accession Number |
|-----------|------------------------|------------------|
| Bi_16_01  | 0316                   | MH674290         |
| Be_07_01  | 0507                   | MH674291         |
| Cu_01_01  | 0601                   | MH674292         |
| Ca_11_01  | 1111                   | MH674293         |
| Do_07_01  | 1307                   | DNP              |
| De_19_01  | 1419                   | MH674294         |
| Cle_05_01 | 1605                   | MH674295         |
| Es_03_01  | 1703                   | MH674296         |
| Le_13_01  | 2013                   | MH674297         |
| L_02_01   | 2202                   | DNP              |
| Li_13_01  | 2513                   | MH674298         |
| No_08_01  | 2608                   | MH674299         |
| Ox_02_01  | 2702                   | MH674300         |
| Ke_04_01  | 3104                   | MH674301         |
| Wo_09_01  | 3209                   | MH674302         |
| Wa_12_01  | 3312                   | MH674303         |
| Nor_17_01 | 3417                   | MH674304         |
| Wi_11_01  | 3611                   | MH674305         |
| Su_09_01  | 3909                   | MH674306         |
| Ch_09_01  | 4009                   | MH674307         |
| Sa_05_01  | 4505                   | MH674308         |
| Ha_20_01  | 4720                   | MH674309         |
| Mi_19_01  | 4819                   | MH674310         |
| Du_04_01  | 5004                   | MH674311         |
| Ed_20_01  | 5120                   | MH674312         |
| Or_04_01  | 5604                   | MH674313         |
| Gl_03_01  | 5903                   | MH674314         |
| Dy_18_01  | 6018                   | MH674315         |
| St_14_01  | 6114                   | MH674316         |
| Sh_01_01  | 6201                   | MH674317         |
| Po_15_01  | 6315                   | MH674318         |
| CR_01_01  | 6401                   | MH674319         |
| CD_03_01  | 6603                   | MH674320         |
| Gy_21_01  | 6721                   | MH674321         |
| IM_10_01  | 6810                   | MH674322         |
| Cl_09_01  | 6909                   | MH674323         |
| Gw_07_01  | 7107                   | MH674324         |
| CA_06_01  | 7206                   | MH674325         |
| CT_02_01  | 7402                   | MH674326         |
| CF_13_01  | 7513                   | MH674327         |
| Or_11_13  | GB0111                 | KX257549         |
| Gl_03_13  | GB0203                 | DNP              |
| Bi_28_13  | GB0528                 | DNP              |
| La_21_13  | GB1521                 | KX257563         |
| Yo_18_13  | GB1818                 | KX257568         |
| Yo_23_13  | GB1823                 | KX257569         |
| Yo_25_14  | GB1925                 | KX257570         |
| An_07_14  | GB2207                 | KX257572         |
| An_10_14  | GB2210                 | KX257602         |

|          |        |          |
|----------|--------|----------|
| Ss_03_13 | GB2803 | KX257575 |
| Gy_07_14 | GB2907 | KX257577 |
| Gy_26_14 | GB2926 | KX257578 |
| Gy_27_14 | GB2927 | KX257579 |
| Ty_20_14 | GB3020 | KX257581 |
| No_30_13 | GB3130 | DNP      |
| Ox_07_14 | GB3807 | KX257591 |
| Ss_25_13 | GB0325 | KX257552 |
| No_15_13 | GB3115 | KX257585 |
| Ox_04_14 | GB3804 | KX257590 |
| Ox_12_14 | GB3812 | KX257592 |

Isolate details. Isolate names and codes used in this and previous papers<sup>15,16</sup> are indicated to allow the reader to compare results between papers. GenBank accession numbers for the capsid sequence from isolates used in the phylogenetic analysis are detailed. DNP = Did not PCR.
